# Supplementary material
Source: PubMed Central journal article supplement (PMC1635156)
Supplement: pnas_0607286103_2.pdf [file pnas_0607286103_2.pdf]

**Table 1. Data collection and refinement statistics**

|                                             | <i>T</i> -p53C<br>V143A                                      | <i>T</i> -p53C<br>Y220C                                      | <i>T</i> -p53C<br>G245S            | <i>T</i> -p53C<br>F270L                                      | <i>T</i> -p53C<br>R273C                                      | <i>T</i> -p53C<br>R282W                                      |
|---------------------------------------------|--------------------------------------------------------------|--------------------------------------------------------------|------------------------------------|--------------------------------------------------------------|--------------------------------------------------------------|--------------------------------------------------------------|
| Data Collection                             |                                                              |                                                              |                                    |                                                              |                                                              |                                                              |
| Space group                                 | <i>P</i> <sub>2</sub> <sub>1</sub> <sub>2</sub> <sub>1</sub> | <i>P</i> <sub>2</sub> <sub>1</sub> <sub>2</sub> <sub>1</sub> | <i>P</i> <sub>2</sub> <sub>1</sub> | <i>P</i> <sub>2</sub> <sub>1</sub> <sub>2</sub> <sub>1</sub> | <i>P</i> <sub>2</sub> <sub>1</sub> <sub>2</sub> <sub>1</sub> | <i>P</i> <sub>2</sub> <sub>1</sub> <sub>2</sub> <sub>1</sub> |
| Cell, Å, °                                  |                                                              |                                                              |                                    |                                                              |                                                              |                                                              |
| <i>a</i>                                    | 64.66                                                        | 64.50                                                        | 68.51                              | 64.71                                                        | 64.72                                                        | 64.81                                                        |
| <i>b</i>                                    | 71.07                                                        | 71.11                                                        | 73.08                              | 71.04                                                        | 70.98                                                        | 71.40                                                        |
| <i>c</i>                                    | 105.00                                                       | 104.90                                                       | 84.76                              | 104.92                                                       | 105.18                                                       | 104.98                                                       |
| β                                           | 90.00                                                        | 90.00                                                        | 90.05                              | 90.00                                                        | 90.00                                                        | 90.00                                                        |
| Molecules/a.u.                              | 2                                                            | 2                                                            | 4                                  | 2                                                            | 2                                                            | 2                                                            |
| Resolution, Å                               | 29.4–1.80<br>(1.90–1.80)                                     | 26.8–1.65<br>(1.74–1.65)                                     | 37.4–1.69<br>(1.78–1.69)           | 41.1–1.80<br>(1.90–1.80)                                     | 31.4–1.80<br>(1.90–1.80)                                     | 29.2–1.60<br>(1.69–1.60)                                     |
| Unique reflections                          | 43,176                                                       | 55,177                                                       | 93,315                             | 45,350                                                       | 44,922                                                       | 64,960                                                       |
| Completeness, %                             | 95.2 (90.8)                                                  | 94.2 (89.2)                                                  | 99.6 (98.4)                        | 99.6 (99.2)                                                  | 98.5 (95.4)                                                  | 99.9 (100)                                                   |
| Multiplicity                                | 6.9 (6.7)                                                    | 8.1 (7.9)                                                    | 3.7 (3.5)                          | 5.4 (5.4)                                                    | 7.0 (5.8)                                                    | 6.3 (6.1)                                                    |
| <i>R</i> <sub>merge</sub> , %*              | 7.3 (28.5)                                                   | 5.9 (19.0)                                                   | 6.7 (27.3)                         | 7.2 (33.0)                                                   | 6.8 (19.9)                                                   | 6.1 (36.4)                                                   |
| < <i>I</i> / <i>σ</i> <sub><i>i</i></sub> > | 21.2 (5.7)                                                   | 24.4 (8.2)                                                   | 15.4 (4.0)                         | 16.1 (4.7)                                                   | 22.5 (6.1)                                                   | 18.3 (4.3)                                                   |
| Wilson <i>B</i> value, Å <sup>2</sup>       | 20.5                                                         | 16.1                                                         | 18.4                               | 17.8                                                         | 20.8                                                         | 19.9                                                         |
| Refinement                                  |                                                              |                                                              |                                    |                                                              |                                                              |                                                              |
| Number of atoms                             |                                                              |                                                              |                                    |                                                              |                                                              |                                                              |
| Protein <sup>†</sup>                        | 3,094                                                        | 3,098                                                        | 6,072                              | 3,092                                                        | 3,070                                                        | 3,006                                                        |
| Water                                       | 391                                                          | 393                                                          | 754                                | 389                                                          | 382                                                          | 354                                                          |
| Ions <sup>‡</sup>                           | 2                                                            | 2                                                            | 8                                  | 2                                                            | 12                                                           | 2                                                            |
| <i>R</i> <sub>cryst</sub> , % <sup>§</sup>  | 18.5                                                         | 18.5                                                         | 18.9                               | 18.4                                                         | 18.8                                                         | 19.8                                                         |
| <i>R</i> <sub>free</sub> , % <sup>§</sup>   | 20.6                                                         | 20.6                                                         | 21.8                               | 21.3                                                         | 20.6                                                         | 22.4                                                         |
| rmsd bonds, Å                               | 0.008                                                        | 0.008                                                        | 0.009                              | 0.009                                                        | 0.008                                                        | 0.009                                                        |
| rmsd angles, °                              | 1.5                                                          | 1.5                                                          | 1.5                                | 1.5                                                          | 1.5                                                          | 1.5                                                          |
| Mean <i>B</i> value, Å <sup>2</sup>         | 23.6                                                         | 18.7                                                         | 20.6                               | 21.8                                                         | 24.0                                                         | 23.3                                                         |
| Ramachandran plot                           |                                                              |                                                              |                                    |                                                              |                                                              |                                                              |
| Most favored, %                             | 91.3                                                         | 90.7                                                         | 90.0                               | 91.3                                                         | 91.2                                                         | 92.1                                                         |
| Additional allowed, %                       | 8.7                                                          | 9.3                                                          | 9.1                                | 8.7                                                          | 8.8                                                          | 7.9                                                          |
| Generously allowed, %                       | 0                                                            | 0                                                            | 0.9                                | 0                                                            | 0                                                            | 0                                                            |
| Disallowed, %                               | 0                                                            | 0                                                            | 0                                  | 0                                                            | 0                                                            | 0                                                            |
| PDB ID code                                 | 2J1W                                                         | 2J1X                                                         | 2J1Y                               | 2J1Z                                                         | 2J20                                                         | 2J21                                                         |

Values in parentheses are for the highest resolution shell.

$$*R_{\text{merge}} = \sum(I_{h,i} - \langle I_h \rangle) / \sum I_{h,i}$$

<sup>†</sup>Numbers include alternative conformations.

<sup>‡</sup>In addition to the bound zinc ion, each chain of *T*-p53C-G245S has a surface-bound calcium ion, and each chain of *T*-p53C-R273C has a surface-bound sulfate ion, which were present at high concentration in the corresponding crystallization buffer.

<sup>§</sup>*R*<sub>cryst</sub> and *R*<sub>free</sub> =  $\sum ||F_{\text{obs}}| - |F_{\text{calc}}|| / \sum |F_{\text{obs}}|$ , where *R*<sub>free</sub> was calculated over 5% of the amplitudes chosen at random and not used in the refinement.
