# Supplementary material
Source: PubMed Central journal article supplement (PMC1635156)
Supplement: pnas_0607286103_3.pdf [file pnas_0607286103_3.pdf]

**Table 2. Changes in free energy of urea-induced unfolding of p53 core domain mutants**

| Mutation | $\Delta\Delta G_{D-N}^{H_2O}$ (kcal/mol)* |                        |
|----------|-------------------------------------------|------------------------|
|          | <i>T</i> -p53C                            | Wild type <sup>†</sup> |
| V143A    | 3.7 ± 0.15 <sup>‡</sup>                   | 3.5 ± 0.06             |
| Y220C    | 4.2 ± 0.06                                | 4.0 ± 0.06             |
| G245S    | 0.8 ± 0.04 <sup>‡</sup>                   | 1.2 ± 0.03             |
| F270L    | 4.1 ± 0.26                                | n. d. <sup>§</sup>     |
| R273C    | -0.4 ± 0.03                               | n. d.                  |
| R282W    | 3.0 ± 0.20 <sup>‡</sup>                   | 3.3 ± 0.10             |

n. d., not determined.

\*  $\Delta\Delta G_{D-N}^{H_2O}$  values represent the change in the free energy of urea-induced unfolding caused by mutations in either *T*-p53C or wild type and are defined as  $\Delta\Delta G_{D-N}^{H_2O} = \Delta G_{D-N}^{T-p53C} - \Delta G_{D-N}^{mut}$  and  $\Delta\Delta G_{D-N}^{H_2O} = \Delta G_{D-N}^{wt} - \Delta G_{D-N}^{mut}$ , respectively. Data were collected at 10°C in 25 mM sodium phosphate, pH 7.2/150 mM KCl/5 mM dithiothreitol.

<sup>†</sup>Data for mutations in the wild-type context are taken from ref. 1.

<sup>‡</sup>Data taken from ref. 2.

<sup>§</sup>F270C destabilizes wild-type core domain by 4.5 kcal/mol (1).

1. Bullock AN, Henckel J, Fersht AR (2000) *Oncogene* 19: 1245-1256.
2. Ang HC, Joerger AC, Mayer S, Fersht AR (2006) *J Biol Chem* 281: 21934-21941.
