# Supplementary material
Source: PubMed Central journal article supplement (PMC1635156)
Supplement: pnas_0607286103_4.pdf [file pnas_0607286103_4.pdf]

**Table 3. Volumes of mutation-induced internal cavities**

| Structure            | Probe radius, Å | Center of cavity gravity<br>(x,y,z), Å | Volume, Å <sup>3</sup> * | No. of lining atoms <sup>†</sup> | Lining residues                                                             |
|----------------------|-----------------|----------------------------------------|--------------------------|----------------------------------|-----------------------------------------------------------------------------|
| <i>T</i> -p53C-V143A | 1.4             | 93.81<br>85.87<br>-28.67               | 46.6 (1.6)               | 35 (27)                          | 113, 124, 133,<br>141, 142, 143,<br>234, 236, 270                           |
| <i>T</i> -p53C-V143A | 1.2             | 94.86<br>86.91<br>-34.52               | 19.3 (1.6)               | 18 (16)                          | 111, 143, 145,<br>157, 232, 234,<br>255                                     |
| <i>T</i> -p53C-V143A | 1.2             | 93.77<br>86.11<br>-28.40               | 62.2 (2.2)               | 33 (25)                          | 113, 124, 133,<br>141, 142, 143,<br>234, 236, 270                           |
| <i>T</i> -p53C-F270L | 1.4             | 96.30<br>85.30<br>-29.97               | 50.8 (0.9)               | 29 (27)                          | 111, 113, 133,<br>143, 159, 234,<br>236, 253, 255,<br>270, 272              |
| <i>T</i> -p53C-F270L | 1.2             | 95.58<br>84.70<br>-30.02               | 89.4 (3.1)               | 40 (35)                          | 111, 113, 133,<br>141, 143, 159,<br>195, 234, 236,<br>253, 255, 270,<br>272 |

\*Cavity volumes were calculated with VOIDOO using different probe sizes (1.2-Å and 1.4-Å radius; cf. *Materials and Methods*). The numbers given are the averages of the size of a mutation-induced cavity (volume occupied by the probe) calculated for 10 random orientations of the molecule. Standard deviations are given in parentheses. In both mutants, the cavity calculated with a probe radius of 1.2 Å is substantially enlarged, because the smaller probe better delineates the shape of the cavity and because of leaking into smaller cavities preexisting in *T*-p53C. In *T*-p53C-V143A, for example, the large cavity at the mutation site includes two preexisting cavities, which have a volume of 16 Å<sup>3</sup> and 19 Å<sup>3</sup> in *T*-p53C. In *T*-p53C-F270L, the cavity comprises two smaller preexisting cavities, with a volume of 19 Å<sup>3</sup> and 22 Å<sup>3</sup> in *T*-p53C. With a probe radius of 1.4 Å, which mimics the size of a water molecule, no cavities next to Val-143 or Phe-270 were detected in *T*-p53C.

<sup>†</sup>The number of carbon atoms lining the cavity is given in parentheses. The high percentage of carbon atoms illustrates the hydrophobic nature of these cavities.
