# Supplementary material
Source: PubMed Central journal article supplement (PMC1635156)

B-factor ( $\text{\AA}^2$ )

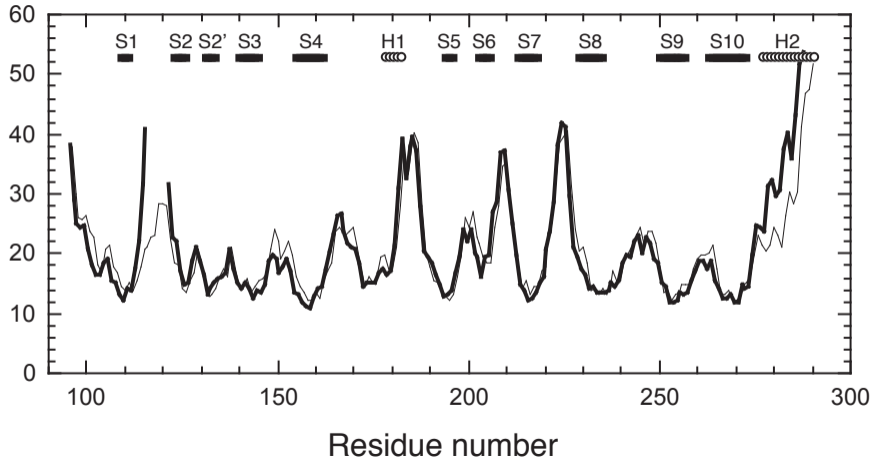

Supplement: pnas_0607286103_1.pdf [file pnas_0607286103_1.pdf]
